# Supplementary material for: Psychometric properties of the Norwegian version of the Patient Health Questionnaire-9 (PHQ-9) in a large female sample of adults with and without eating disorders
Source: PubMed Central journal article supplement (PMC7786911; doi:10.1186/s12888-020-03013-0), 2021-01-05

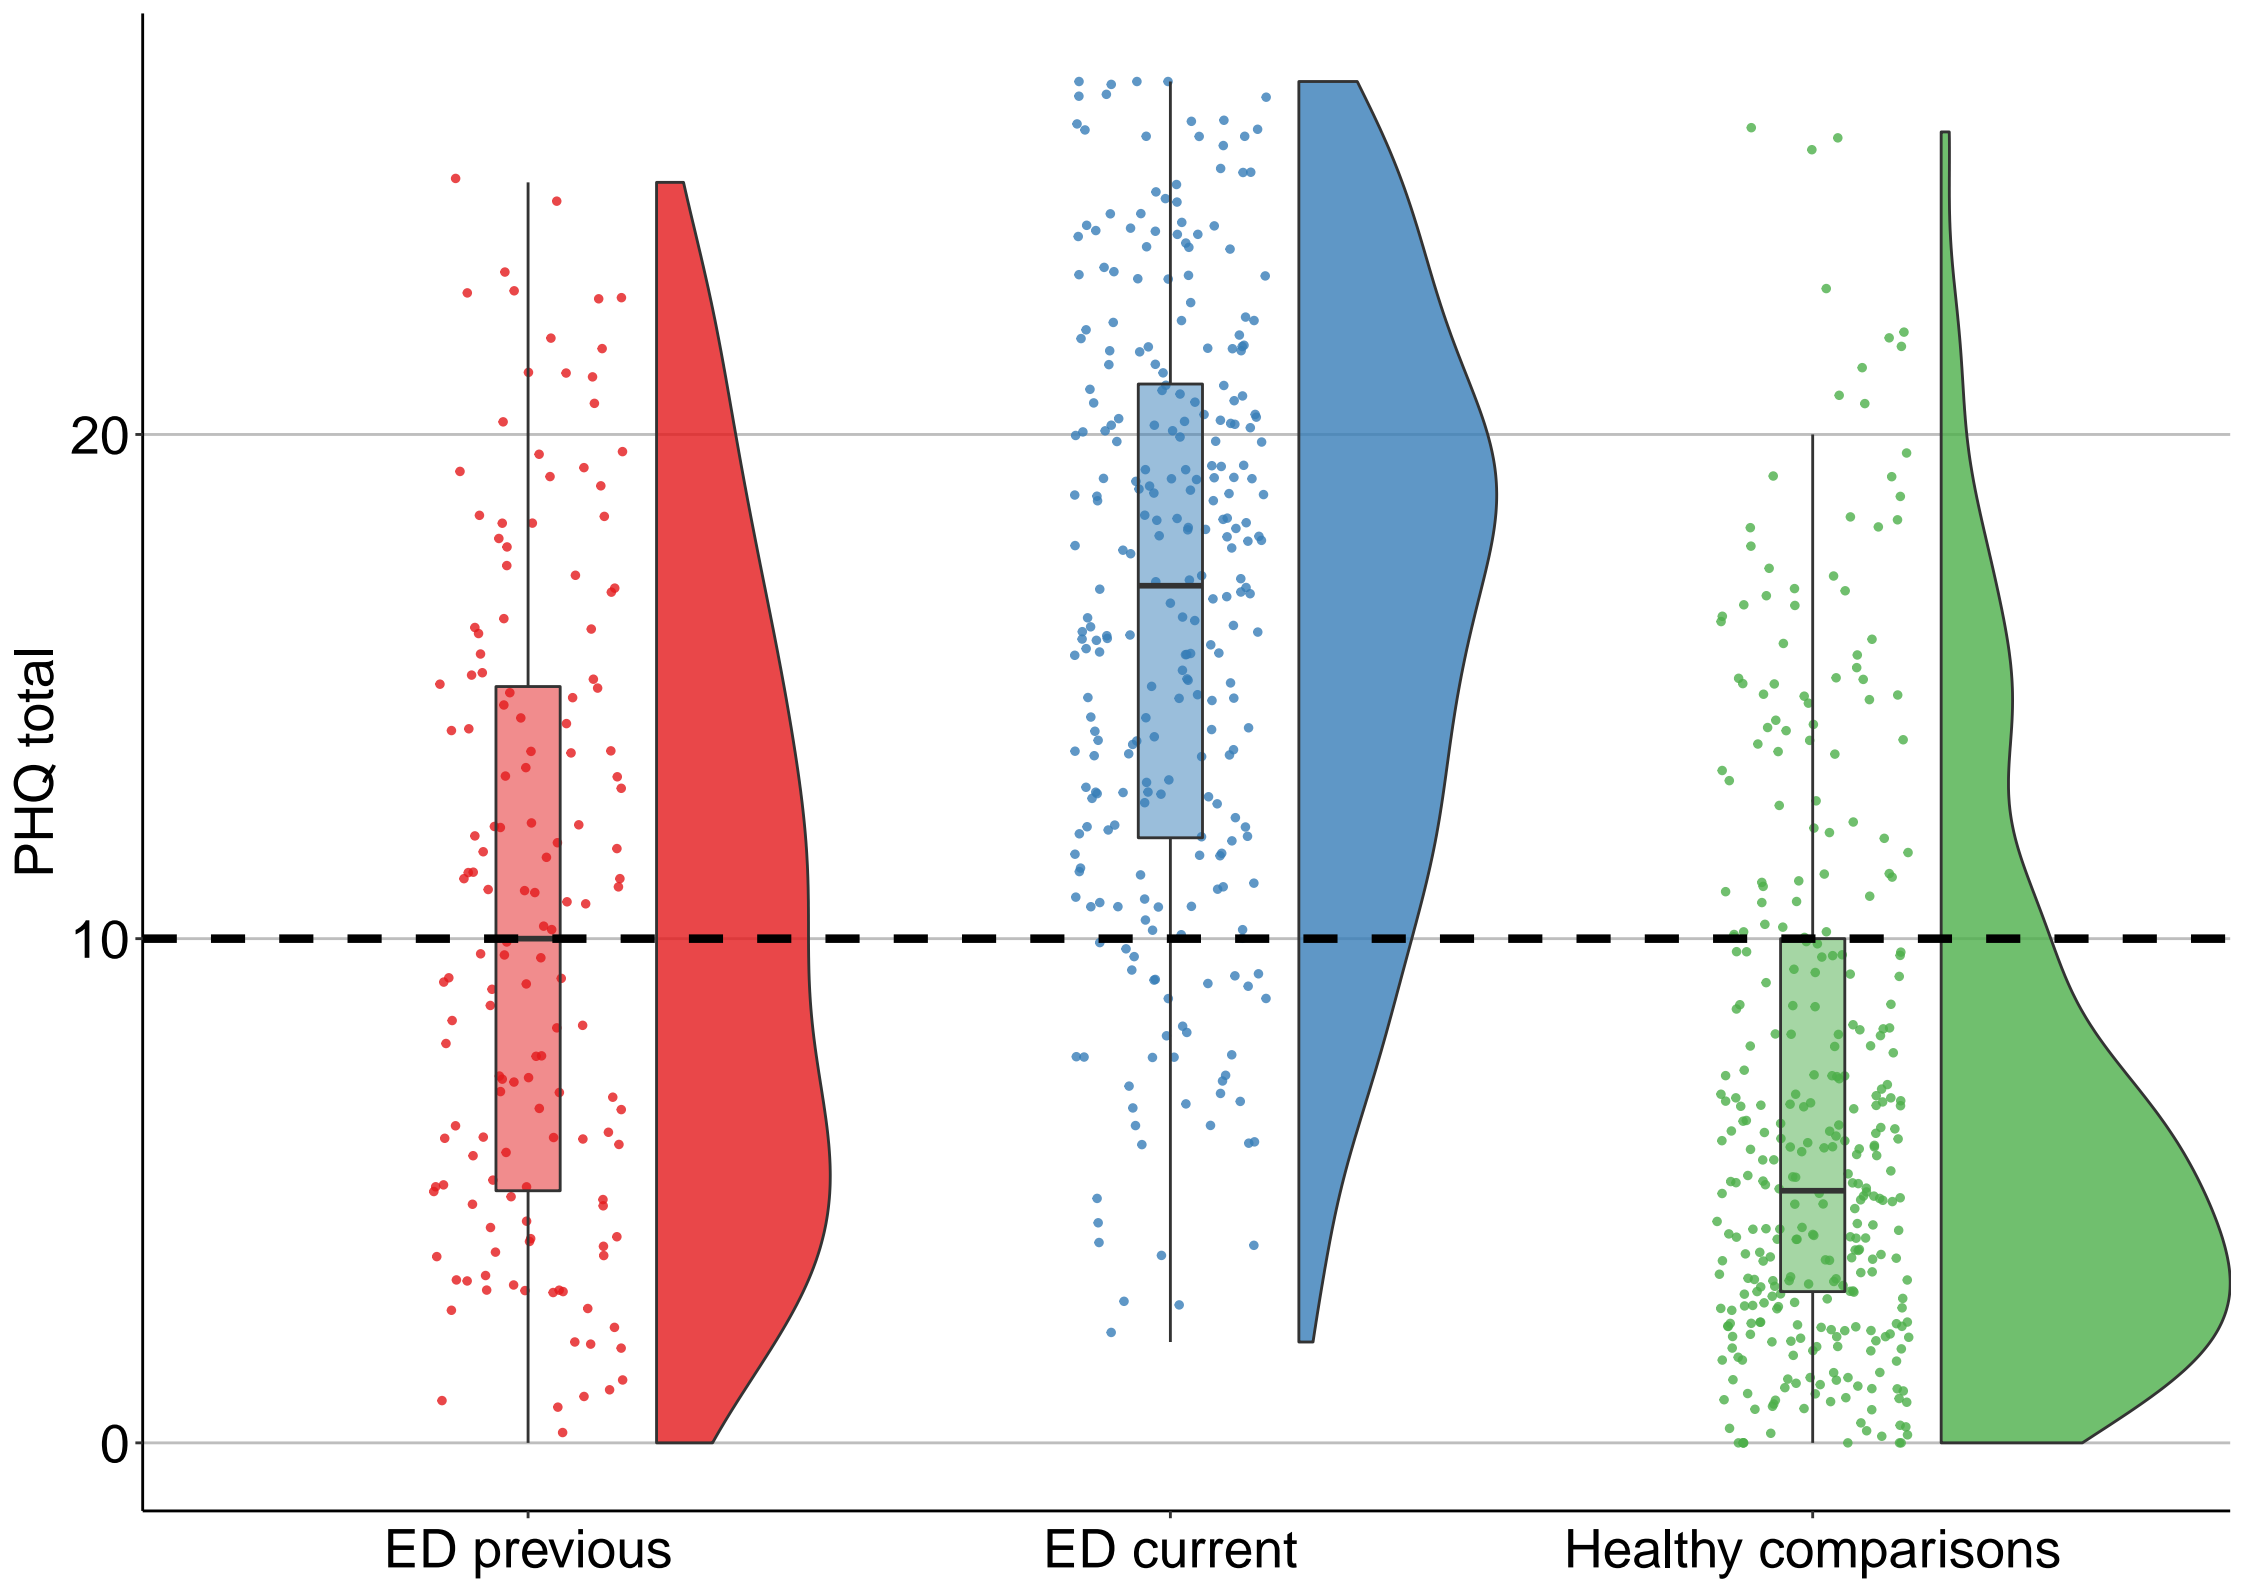

Supplement: 12888_2020_3013_MOESM1_ESM.pdf [file 12888_2020_3013_MOESM1_ESM.pdf]
